# Supplementary material for: Transcriptional mechanism of vascular endothelial growth factor-induced expression of protein kinase CβII in chronic lymphocytic leukaemia cells
Source: PubMed Central journal article supplement (PMC5324130; doi:10.1038/srep43228), 2017-02-24
Supplement: srep43228-s1.pdf [file srep43228-s1.pdf]

# Supplementary Figures

**Transcriptional mechanism of vascular endothelial growth factor-induced expression of protein kinase C $\beta$ II in chronic lymphocytic leukaemia cells.**

Ola Al-Sanabra, Andrew D. Duckworth, Mark A. Glenn, Benjamin R.B. Brown, Piera Angelillo, Kelvin Lee, John Herbert, Francesco Falciani, Nagesh Kalakonda, and Joseph R. Slupsky.

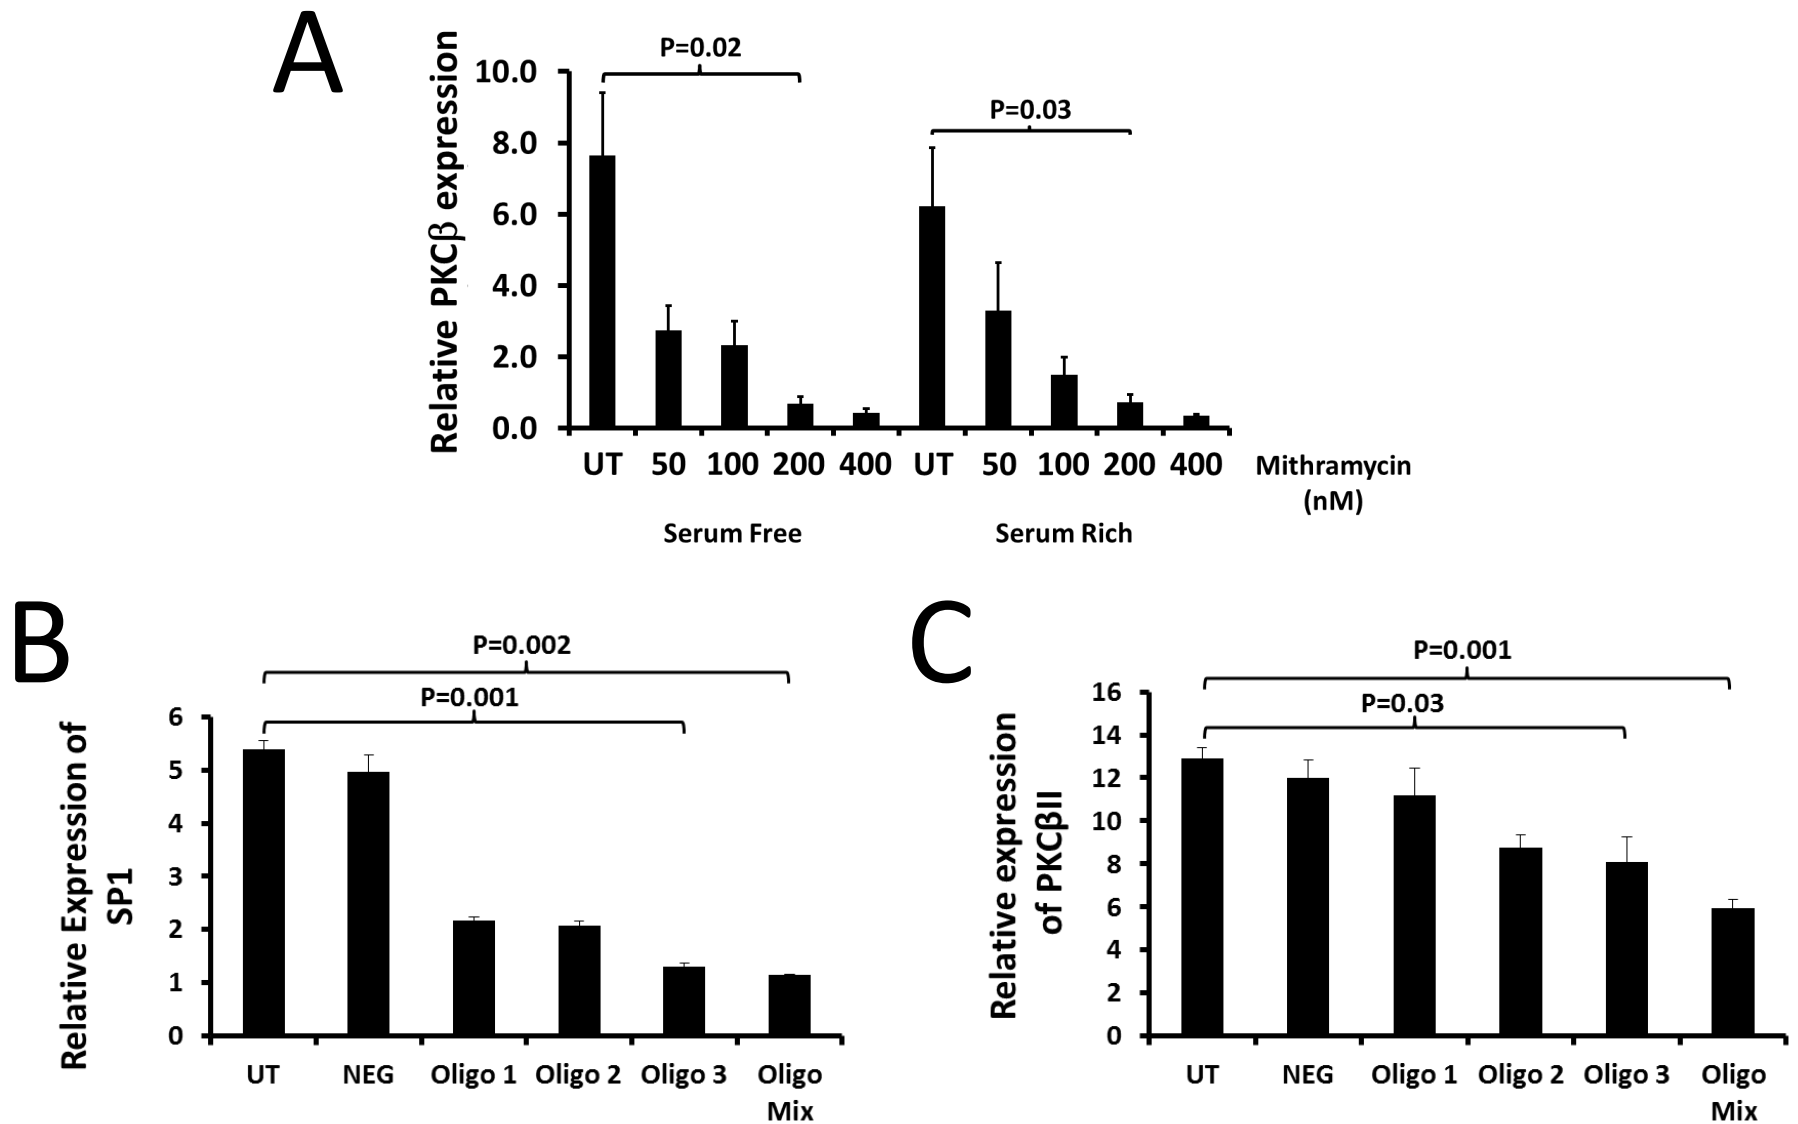

**Supplementary Figure 1** *Treatment of Mec1 cells with mithramycin or SP1-specific siRNA reduces PKC $\beta$  mRNA levels.*  $2 \times 10^6$  MEC1 were either were cultured for 24h in the presence of the indicated concentrations of mithramycin (in nmol/L), or were nucleofected with the indicated SP1-specific (Oligo 1, 2, 3 and mix) or control siRNA (NEG) oligonucleotides and then cultured as described in the materials and methods for each cell type. Harvested cells were analyzed by qRT-PCR for SP1 (A, B) or for PKC $\beta$ II mRNA (C) using RNAPolIII as a reference gene. The results presented represent the mean $\pm$ SE of n=3 separate replicates. Statistical analysis for all parts in this figure were performed using a students t-test for paired data. UT - untreated

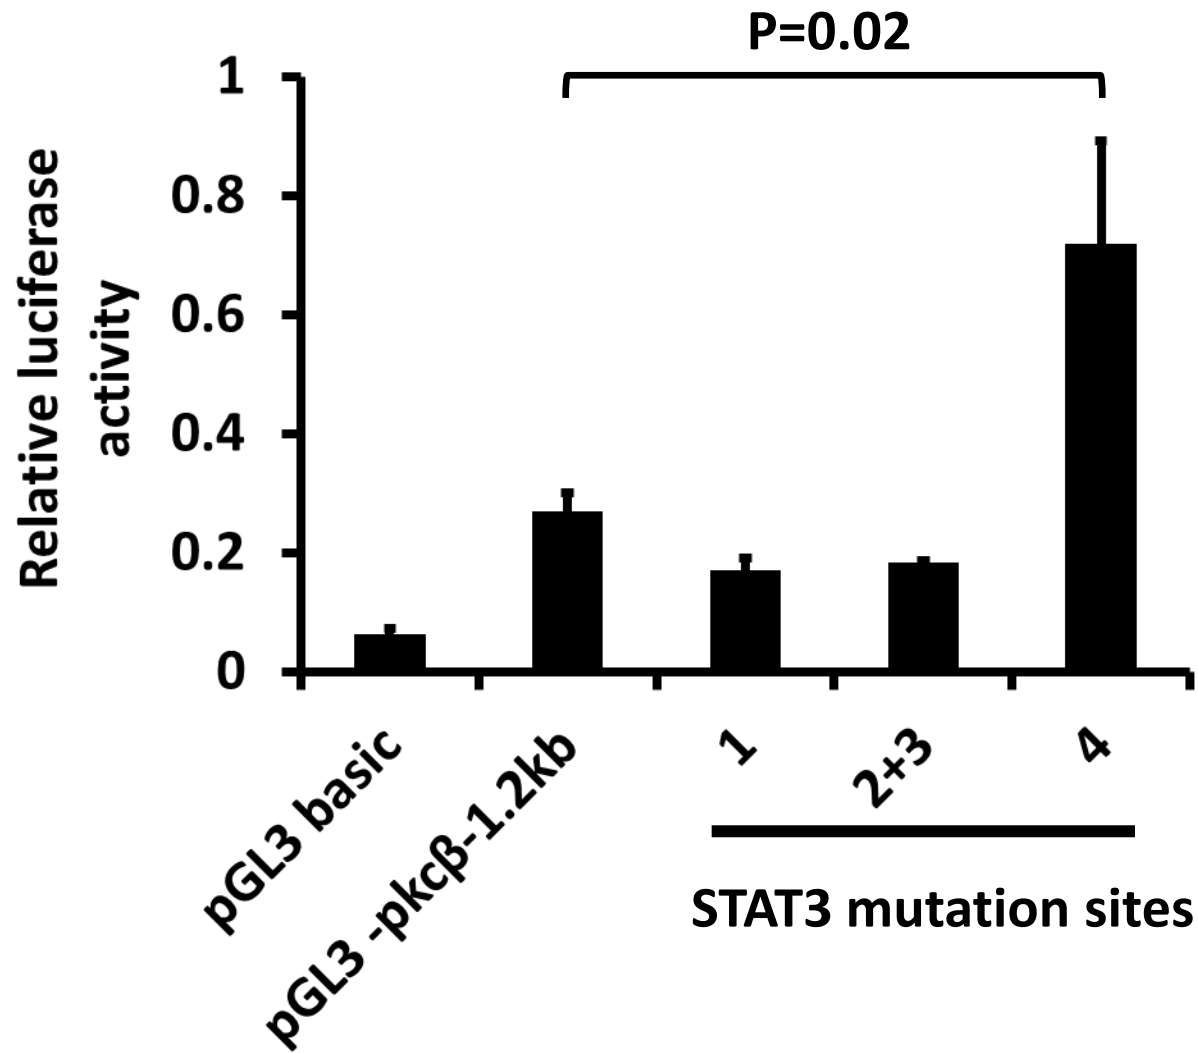

**Supplementary Figure 2** *Analysis of STAT3 repression of PRKCB promoter function in Mec1 cells.*  $2 \times 10^6$  MEC1 were cotransfected with (0.1  $\mu$ g) pRL and (2  $\mu$ g each) of wt pGL3-pkc $\beta$ -1.2kb, or site 1, site 2+3, or site 4 mutants of STAT3 binding sites within the PRKCB promoter of the pGL3-pkc $\beta$ -1.2kb construct. Luciferase assays were performed following 72h culture of the cells under serum-rich conditions, and are reported relative to renilla expression. The data represented mean  $\pm$  SE of three independent experiments. Statistical analysis was performed using a student's t-test for paired data.

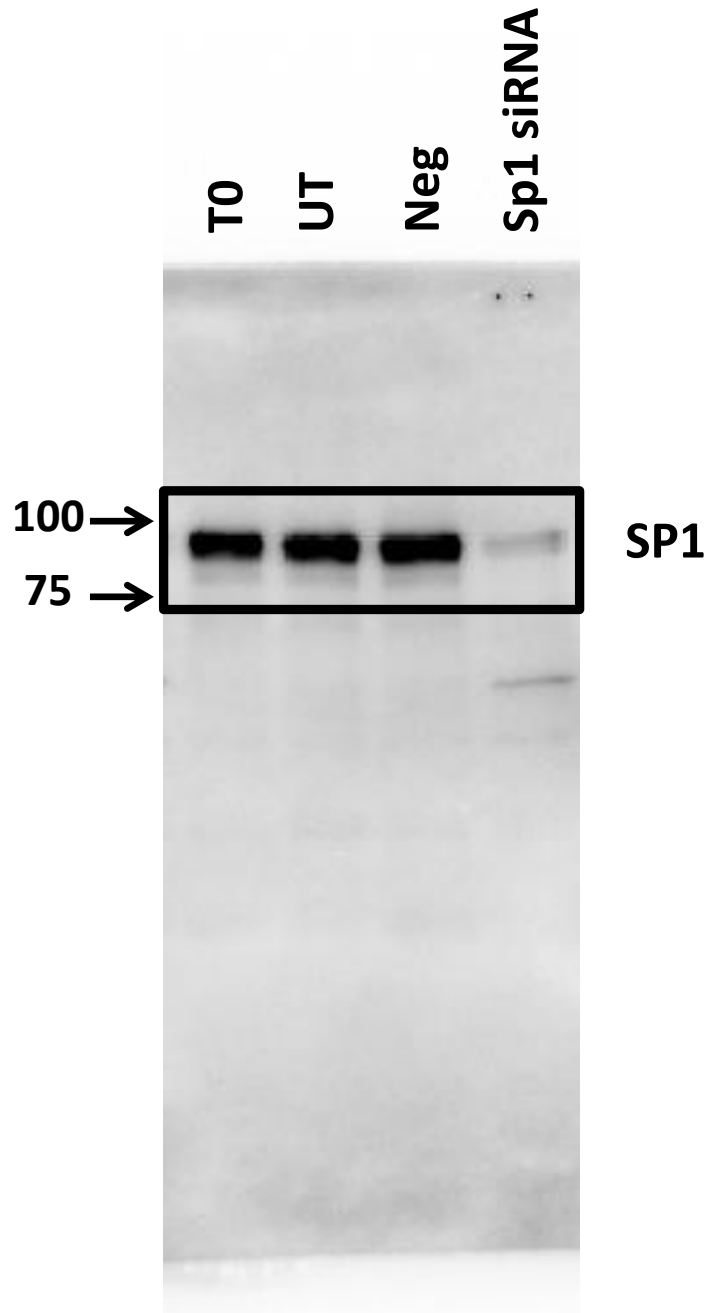

**Supplementary Figure 3.** Uncropped Western blot for SP1 represented in manuscript Figure 1E upper panel.

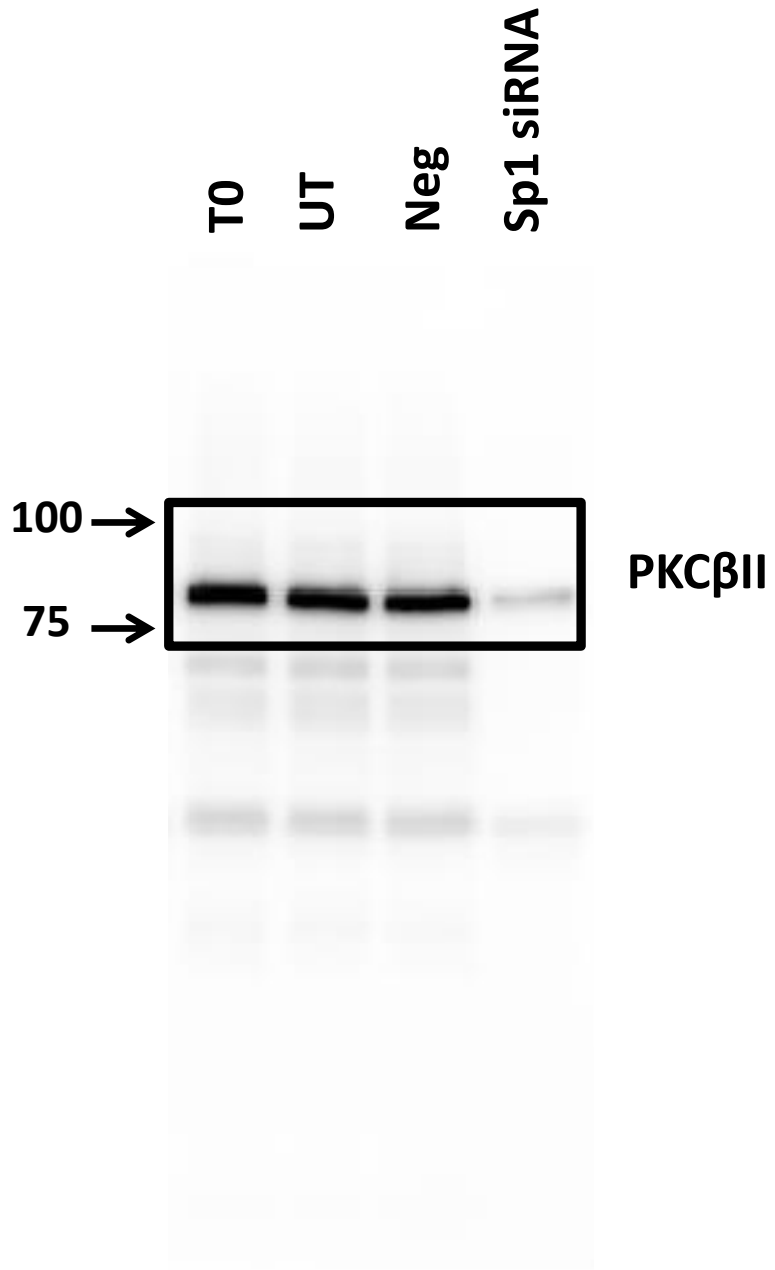

**Supplementary Figure 4.** Uncropped Western blot for PKC $\beta$ II represented in manuscript Figure 1E middle panel.

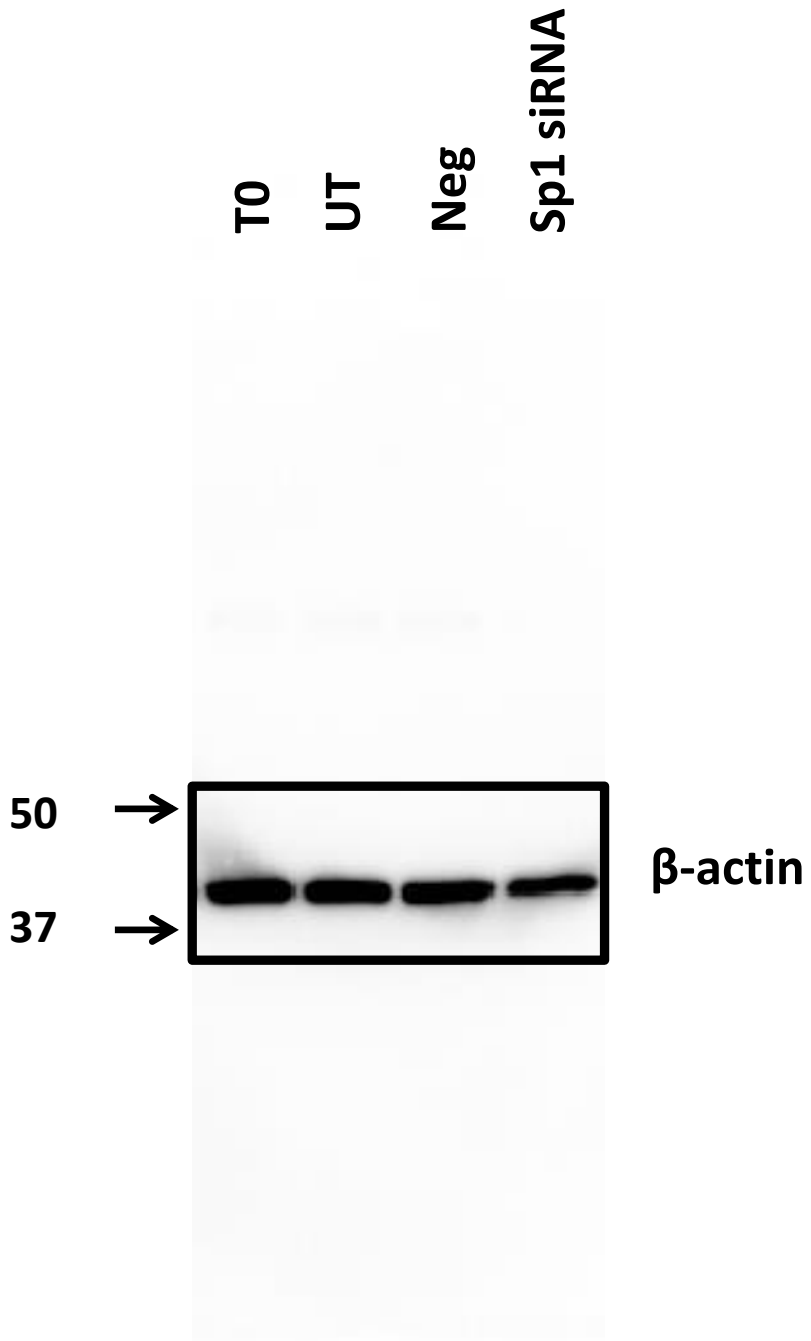

**Supplementary Figure 5.** Uncropped Western blot for  $\beta$ -actin represented in manuscript Figure 1E lower panel.
